# Supplementary material
Source: PubMed Central journal article supplement (PMC9349960)
Supplement: IJC-9999-0-s001.pdf [file IJC-9999-0-s001.pdf]

## **Supplementary Material**

### **Response to anti-SARS-CoV-2 mRNA vaccines in multiple myeloma and chronic lymphocytic leukemia patients**

**Joanna Zaleska<sup>1,2</sup>, Paulina Kwasnik<sup>1</sup>, Magdalena Paziewska<sup>1</sup>, Joanna Purkot<sup>1,2</sup>, Aleksandra Szabelak<sup>1</sup>, Mateusz Jurek<sup>1</sup>, Natalia Masny<sup>1</sup>, Izabela Dziaekiewicz<sup>1</sup>, Bartosz Pronobis-Szczylik<sup>1</sup>, Agnieszka Piebiak<sup>2</sup>, Agnieszka Szymczyk<sup>2,3</sup>, Katarzyna Jarosz-Chudzik<sup>1,2</sup>, Lukasz Bolkun<sup>4</sup>, Katarzyna Kozłowska<sup>4</sup>, Jarosław Piszcz<sup>4</sup>, Edyta Subocz<sup>5</sup>, Janusz Halka<sup>5</sup>, Michał Bator<sup>6</sup>, Elzbieta Kalicińska<sup>6</sup>, Tomasz Wróbel<sup>6</sup>, Lidia Usnarska-Zubkiewicz<sup>6</sup>, Justyna Rybka<sup>6</sup>, Izabela Deren-Wagemann<sup>7</sup>, Marta Szyca-Smieszniak<sup>7</sup>, Jarosław Dybko<sup>7</sup>, Iwona Hus<sup>3,8</sup>, Bartosz Pula<sup>8</sup>, Edyta Cichocka<sup>9</sup>, Marcin Rymko<sup>9</sup>, Dorota Zdunczyk<sup>10</sup>, Mateusz Ziarkiewicz<sup>10</sup>, Grzegorz Władysław Basak<sup>10</sup>, Lars Bullinger<sup>11,12</sup> and Krzysztof Giannopoulos<sup>1,2</sup>**

Table of contents:

1. Supplementary Materials & Methods. Dextramer staining
2. Supplementary Table 1. Total neutralizing anti-RBD antibodies levels by treatment protocols in vaccinated CLL patients
3. Supplementary Table 2. Total neutralizing anti-RBD antibodies levels by treatment protocols in vaccinated MM patients

## 1. Supplementary Materials & Methods

### *Dextramer staining*

To evaluate cytotoxic T cell response, PBMCs from HLA-A\*0201 positive CLL and MM patients were analyzed using dextramer staining with the most common SARS-CoV-2 specific epitope - HLA-A\*0201/YLQPRTFLL (Immudex). Peripheral blood mononuclear cells were isolated by Biocoll density gradient centrifugation (Biochrom). Next,  $1 \times 10^6$  cells were incubated with  $5 \mu\text{l}$  of anti-HLA-A2 FITC for 15 min at room temperature in the dark and assessed by BD FACSLyric. Next, only from HLA-A2 positive samples  $1-3 \times 10^6$  cells were incubated with  $1 \mu\text{l}$  of Fixable Viability Stain 700 (BD Biosciences) at room temperature for 15 min in the dark. Further,  $10 \mu\text{l}$  of dextramer HLA-A\*0201/YLQPRTFLL-specific-phycoerythrin (PE, Immudex, Copenhagen, Denmark) conjugated complex was added to cells and incubated at room temperature for 10 min in the dark. Next, anti-CD3 BV510, anti-CD4 APC-Cy7, anti-CD8 Percp-Cy 5.5, anti-CD45RA BV421, anti-CCR7 FITC, anti-CD27 APC, and anti-CD28 Pe-Cy7 (all BD Biosciences) were added to cells and incubated for 20 min at  $4^\circ\text{C}$  in the dark. Cells were analyzed using BD FACS Suite (BD FACSLyric). Results were compared to isotypic controls and fluorescence minus one control (FMOC), with the exclusion of dead cells to characterize naïve (CD45RA+CCR7+), central memory (CD45RA-CCR7+), effector memory (CD45RA-CCR7-), and terminally differentiated effector memory (CD45RA+CCR7-) phenotype of specific cytotoxic T cells.

Supplementary Table 1. Total neutralizing anti-RBD antibodies levels by treatment protocols in vaccinated CLL patients

| Type of treatment                 | CLL Patients | Median OD Values |           |          |
|-----------------------------------|--------------|------------------|-----------|----------|
|                                   |              | Baseline         | 2-5 weeks | 12 weeks |
| Anti-CD20 mAb combined            | 29           | 0.091            | 0.097     | 1.668    |
| BTKi/ BTKi + Anti-CD20            | 8            | 0.106            | 0.107     | 2.052    |
| BCL2/BCL2 + Anti-CD20 mAb         | 8            | 0.092            | 0.065     | 0.667    |
| BTKi + BCL2                       | 2            | 0.085            | 0.068     | 0.160    |
| Alkylating agents /Purine analogs | 2            | 0.060            | no data   | 3.587    |
| Immunochemotherapy                | 22           | 0.089            | 0.111     | 1.668    |
| PI3K inhibitor                    | 1            | 2.888            | 2.112     | 3.400    |
| No specified                      | 5            |                  |           |          |

Supplementary Table 2. Total neutralizing anti-RBD antibodies levels by treatment protocols in vaccinated MM patients

| <b>Type of treatment</b>                            | <b>MM Patients</b> | <b>Median OD Values</b> |                  |                 |
|-----------------------------------------------------|--------------------|-------------------------|------------------|-----------------|
|                                                     |                    | <b>Baseline</b>         | <b>2-5 weeks</b> | <b>12 weeks</b> |
| Immunomodulatory drugs +/-<br>Proteasome inhibitors | 33                 | 0.081                   | 1.339            | 3.327           |
| Proteasome inhibitors                               | 5                  | 0.075                   | 2.999            | 3.327           |
| Anti-CD38 mAb in combination                        | 4                  | 0.099                   | 0.344            | 2.419           |
| No specified                                        | 6                  |                         |                  |                 |
